# Supplementary material for: Can FEM-based preoperative planning for Complex Tibial Plateau Fractures improve surgical skills? A Cadaver Study
Source: Research Square preprint supplement (doi:10.21203/rs.3.rs-7900709/v1), 2025-11-20
Supplement: Supplementary file 1 [file 40b7e1e8a41aa7672831ac6d.xlsx]

## Sheet: Tabelle1
Case	Group	Total Screws	Lag Screws	Time Repo	Time Osteo	Time Total	Dose cGy reposition	Dose cGy osteosynthesis	NASA-TLX	stiffness in N/mm	load to failure in N
case1	unplanned	11	0	20	36	56	142	336	56	577.957	200
case2	unplanned	10	3	44	25	69	299	707	60	374.332	300
case3	unplanned	8	0	27	16	43	81	197	49	197.709	250
case4	unplanned	9	1	15	26	41	77	204	34	992.063	750
case5	unplanned	12	2	13	20	33	63	166	52.0667	424.448	400
case6	unplanned	11	0	45	50	95	226	424	42.6667	1333.33	750
case7	planned	10	2	6	59	65	40	440	23.6667	504.202	250
case8	planned	11	2	9	48	57	10	380	30	801.282	800
case9	planned	11	2	20	40	60	148	474	33.3333	1833.33	1800
case10	planned	10	1	35	31	66	120	559	15.6667	857.143	1550
case11	planned	12	3	19	25	44	158	309	44.3333	513.158	650
case12	planned	10	1	22	44	66	71	450	53	884.615	1250
	mean	10.1667	1	27.3333	28.8333	56.1667	148	339	48.9556	649.974	441.667
	SD	1.34371	1.1547	12.9185	11.2904	20.868	87.2506	187.517	8.6072	391.701	226.231
	mean	10.6667	1.83333	18.5	41.1667	59.6667	91.1667	435.333	33.3333	898.956	1050
	SD	0.745356	0.687184	9.42956	11.0968	7.7603	54.9861	77.5106	12.4127	445.202	534.634
		0.483542	0.195651	0.245073	0.112109	0.732495	0.246045	0.313375	0.0433115	0.369919	0.0411172
		Tibia
	Case	Median	Mean
Pair 1	case7	109	111
	case1	116	121
Pair 2	case9	50	63
	case3	115	119
Pair 3	case4	50	59
	case10	83	87
Pair 4	case8	171	180
	case2	112	117
Pair 5	case11	140	146
	case5	142	147
Pair 6	case6	178	182
	case12	97	110
